SUMMER 2023 | VOLUME 35 | NUMBER 3

The Journal of  
**Neuropsychiatry**  
and Clinical Neurosciences

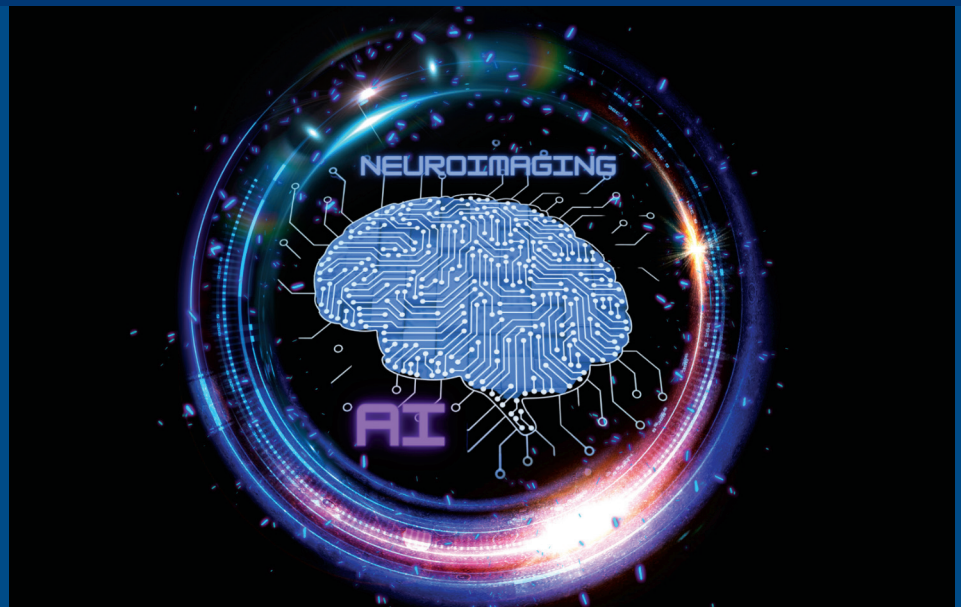

Treatment of Comorbid Anxiety and Epilepsy

Long-Term Changes in Poststroke Depressive Symptoms:  
Effects of Functional Disability and Social Support

Neuropsychiatric Status of Patients With Multiple  
Sclerosis Across Disease Duration Intervals

Posttraumatic Stress Symptoms Among COVID-19  
Survivors After Hospitalization

ANPA 2023 Annual Meeting Abstracts

Official Journal of the American Neuropsychiatric Association  
[neuro.psychiatryonline.org](http://neuro.psychiatryonline.org)
